# Supplementary material for: Sensitivity of air quality model responses to emission changes: comparison of results based on four EU inventories through FAIRMODE benchmarking methodology
Source: Copernicus journal article supplement (doi:10.5194/gmd-17-587-2024), 2024-01-25
Supplement: Supplementary file 1 [file gmd-17-587-2024-supplement.pdf]

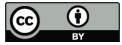

*Supplement of*

**Sensitivity of air quality model responses to emission changes:  
comparison of results based on four EU inventories through FAIRMODE  
benchmarking methodology**

Alexander de Meij et al.

*Correspondence to:* Philippe Thunis ([philippe.thunis@ec.europa.eu](mailto:philippe.thunis@ec.europa.eu))

The copyright of individual parts of the supplement might differ from the article licence.

Supplement of:

## Sensitivity of air quality model responses to emission changes: comparison of results based on four EU inventories through FAIRMODE benchmarking methodology.

5 Alexander de Meij<sup>1</sup>, Cornelis Cuvelier<sup>2\*</sup>, Philippe Thunis<sup>2</sup>, Enrico Pisoni<sup>2</sup>, Bertrand Bessagnet<sup>2</sup>

<sup>1</sup>MetClim, Varese, 21025, Italy

<sup>2</sup> European Commission, Joint Research Centre (JRC), 21027, Ispra, Italy

♦ retired with Active Senior Agreement

10

**Table S1 List of local domains selected, with their corresponding area for emission reductions.**

| Country           | City      |     | lon<br>min | lon<br>max | lat<br>min | lat<br>max |
|-------------------|-----------|-----|------------|------------|------------|------------|
| Belgium           | Brussels  | BRU | 4.05       | 4.65       | 50.55      | 51.15      |
| Germany           | Berlin    | BER | 12.76      | 14.06      | 51.87      | 53.17      |
| Italy             | Rome      | ROM | 12.09      | 12.89      | 41.5       | 42.3       |
| Spain             | Madrid    | MAD | -4.15      | -3.25      | 39.96      | 40.86      |
| Sweden            | Stockholm | STO | 17.62      | 18.52      | 58.88      | 59.78      |
| Romania           | Bucharest | BUC | 25.90      | 26.30      | 44.23      | 44.63      |
| Malopolska region |           | MAL | 18.0       | 23.0       | 48.7       | 51.5       |
| Po Valley         |           | POV | 6.5        | 14.0       | 43.5       | 47.0       |

**Table S2 Overview GNFR sectors**

| GNFR sector           |
|-----------------------|
| A PublicPower         |
| B Industry            |
| C OtherStationaryComb |
| D Fugitive            |
| E Solvents            |
| F RoadTransport       |
| G Shipping            |
| H Aviation            |
| I OffRoad             |
| J Waste               |
| K AgriLiveStock       |
| L AgriOther           |
| M Other               |

15

**Table S3. Overview total emissions per emission inventory for the different locations, mg/m2/day**

| PPM        | EDGAR | EMEP-GNFR | CAMS221 | CAMS42C |
|------------|-------|-----------|---------|---------|
| Berlin     | 1.82  | 1.38      | 1.64    | 1.93    |
| Brussels   | 4.38  | 4.34      | 5.19    | 4.94    |
| Bucharest  | 7.63  | 3.06      | 8.04    | 8.16    |
| Madrid     | 3.24  | 2.41      | 3.06    | 3.47    |
| Malopolska | 3.49  | 2.41      | 2.68    | 3.21    |
| Po Valley  | 1.65  | 1.45      | 1.40    | 1.51    |
| Rome       | 2.63  | 2.48      | 2.44    | 2.52    |
| Stockholm  | 3.33  | 3.09      | 1.69    | 2.19    |

| VOC        | EDGAR | EMEP-GNFR | CAMS221 | CAMS42C |
|------------|-------|-----------|---------|---------|
| Berlin     | 15.65 | 7.67      | 8.55    | 8.78    |
| Brussels   | 40.50 | 15.29     | 16.13   | 14.93   |
| Bucharest  | 26.35 | 15.73     | 28.15   | 21.40   |
| Madrid     | 21.28 | 18.97     | 20.31   | 19.00   |
| Malopolska | 12.11 | 6.71      | 6.35    | 7.06    |
| Po Valley  | 6.65  | 6.72      | 6.08    | 5.74    |
| Rome       | 21.05 | 16.66     | 17.69   | 16.02   |
| Stockholm  | 18.13 | 7.63      | 9.69    | 9.46    |

20

| NOx        | EDGAR | EMEP-GNFR | CAMS221 | CAMS42C |
|------------|-------|-----------|---------|---------|
| Berlin     | 9.76  | 8.50      | 7.72    | 8.24    |
| Brussels   | 31.57 | 27.21     | 31.05   | 28.16   |
| Bucharest  | 13.94 | 17.01     | 19.93   | 18.28   |
| Madrid     | 16.15 | 16.59     | 19.44   | 15.05   |
| Malopolska | 7.36  | 7.79      | 8.20    | 8.04    |
| Po Valley  | 5.23  | 5.62      | 5.48    | 5.16    |
| Rome       | 12.01 | 11.54     | 12.26   | 10.11   |
| Stockholm  | 10.71 | 7.41      | 7.01    | 6.03    |

| SOx        | EDGAR | EMEP-GNFR | CAMS221 | CAMS42C |
|------------|-------|-----------|---------|---------|
| Berlin     | 3.82  | 1.48      | 1.65    | 1.57    |
| Brussels   | 7.23  | 2.56      | 3.07    | 2.75    |
| Bucharest  | 9.51  | 7.49      | 5.95    | 6.00    |
| Madrid     | 6.54  | 2.43      | 2.56    | 2.69    |
| Malopolska | 8.72  | 8.71      | 8.69    | 8.86    |
| Po Valley  | 1.31  | 0.73      | 0.82    | 0.81    |
| Rome       | 2.25  | 0.74      | 0.94    | 0.79    |
| Stockholm  | 11.43 | 0.67      | 1.03    | 0.80    |

| NH3        | EDGAR | EMEP-GNFR | CAMS221 | CAMS42C |
|------------|-------|-----------|---------|---------|
| Berlin     | 4.02  | 2.26      | 3.77    | 3.25    |
| Brussels   | 7.69  | 3.34      | 5.36    | 5.11    |
| Bucharest  | 3.34  | 4.40      | 6.89    | 6.69    |
| Madrid     | 3.24  | 1.91      | 3.13    | 3.60    |
| Malopolska | 3.52  | 1.27      | 1.79    | 2.05    |
| Po Valley  | 4.58  | 3.16      | 3.24    | 3.17    |
| Rome       | 3.65  | 2.41      | 2.52    | 1.88    |
| Stockholm  | 1.67  | 0.61      | 1.06    | 0.60    |

25

**Table S4(a) Overview of Base Case emissions (mg/m<sup>2</sup>/day) for NO<sub>x</sub> and NH<sub>3</sub>, together with the ratio in the emissions between these two pollutants. (b) Similar as to (a) but for potency at P95 in µg/m<sup>3</sup>.**

(a)

| Emissions mg/m <sup>2</sup> /day |        |               |         |         | Ratio emissions NO <sub>x</sub> /NH <sub>3</sub> |               |         |         |
|----------------------------------|--------|---------------|---------|---------|--------------------------------------------------|---------------|---------|---------|
| NO <sub>x</sub>                  | EDGAR  | EMEP-<br>GNFR | CAMS221 | CAMS42C | EDGAR                                            | EMEP-<br>GNFR | CAMS221 | CAMS42C |
| BER                              | 9.764  | 8.501         | 7.717   | 8.236   | 2.43                                             | 3.76          | 2.05    | 2.53    |
| BRU                              | 31.572 | 27.208        | 31.046  | 28.161  | 4.10                                             | 8.16          | 5.79    | 5.52    |
| BUC                              | 13.944 | 17.014        | 19.926  | 18.279  | 4.18                                             | 3.86          | 2.89    | 2.73    |
| MAD                              | 16.149 | 16.586        | 19.437  | 15.053  | 4.99                                             | 8.70          | 6.21    | 4.18    |
| MAL                              | 7.36   | 7.79          | 8.195   | 8.039   | 2.09                                             | 6.14          | 4.57    | 3.93    |
| POV                              | 5.229  | 5.617         | 5.482   | 5.155   | 1.14                                             | 1.78          | 1.69    | 1.63    |
| ROM                              | 12.012 | 11.544        | 12.257  | 10.11   | 3.29                                             | 4.80          | 4.86    | 5.39    |
| STO                              | 10.709 | 7.411         | 7.01    | 6.027   | 6.42                                             | 12.22         | 6.62    | 10.03   |

30

| Emissions mg/m <sup>2</sup> /day |       |               |         |         |
|----------------------------------|-------|---------------|---------|---------|
| NH <sub>3</sub>                  | EDGAR | EMEP-<br>GNFR | CAMS221 | CAMS42C |
| BER                              | 4.023 | 2.261         | 3.766   | 3.253   |
| BRU                              | 7.694 | 3.335         | 5.362   | 5.106   |
| BUC                              | 3.336 | 4.404         | 6.886   | 6.69    |
| MAD                              | 3.238 | 1.907         | 3.13    | 3.598   |
| MAL                              | 3.522 | 1.269         | 1.792   | 2.046   |
| POV                              | 4.583 | 3.156         | 3.235   | 3.172   |
| ROM                              | 3.652 | 2.406         | 2.524   | 1.875   |
| STO                              | 1.668 | 0.6067        | 1.059   | 0.6006  |

(b)

| Potency P95 (µg/m <sup>3</sup> /ton) |         |               |         |         | Ratio Potency NO <sub>x</sub> /NH <sub>3</sub> |               |         |         |
|--------------------------------------|---------|---------------|---------|---------|------------------------------------------------|---------------|---------|---------|
| NO <sub>x</sub>                      | EDGAR   | EMEP-<br>GNFR | CAMS221 | CAMS42C | EDGAR                                          | EMEP-<br>GNFR | CAMS221 | CAMS42C |
| BER                                  | -0.0018 | -0.0011       | -0.0024 | -0.0018 | 0.11                                           | 0.07          | 0.19    | 0.14    |
| BRU                                  | 0.0013  | 0.0013        | 0.0015  | 0.0012  | -0.05                                          | -0.02         | -0.03   | -0.02   |
| BUC                                  | -0.0067 | -0.0047       | -0.0019 | -0.0017 | 0.07                                           | 0.12          | 0.05    | 0.05    |
| MAD                                  | 0.0002  | -0.0002       | -0.0002 | -0.0013 | -0.01                                          | 0.01          | 0.01    | 0.07    |
| MAL                                  | -0.001  | -0.0011       | -0.0004 | -0.001  | 0.20                                           | 0.09          | 0.05    | 0.10    |
| POV                                  | -0.0064 | -0.0047       | -0.0046 | -0.0059 | 1.64                                           | 0.67          | 0.79    | 0.78    |
| ROM                                  | -0.022  | -0.0076       | -0.0151 | -0.0089 | 0.27                                           | 0.10          | 0.17    | 0.10    |
| STO                                  | -0.0011 | -0.0011       | -0.0006 | -0.0005 | 0.01                                           | 0.02          | 0.01    | 0.01    |

| Potency P95 (µg/m <sup>3</sup> /ton) |         |               |         |         |
|--------------------------------------|---------|---------------|---------|---------|
| NH <sub>3</sub>                      | EDGAR   | EMEP-<br>GNFR | CAMS221 | CAMS42C |
| BER                                  | -0.0162 | -0.0168       | -0.0125 | -0.013  |
| BRU                                  | -0.0253 | -0.0738       | -0.0473 | -0.0507 |
| BUC                                  | -0.095  | -0.0384       | -0.0398 | -0.0375 |
| MAD                                  | -0.0229 | -0.0227       | -0.0193 | -0.0174 |
| MAL                                  | -0.0051 | -0.0116       | -0.0082 | -0.0098 |
| POV                                  | -0.0039 | -0.007        | -0.0058 | -0.0076 |
| ROM                                  | -0.0803 | -0.0773       | -0.0884 | -0.0928 |
| STO                                  | -0.0779 | -0.0644       | -0.0515 | -0.049  |

35

40

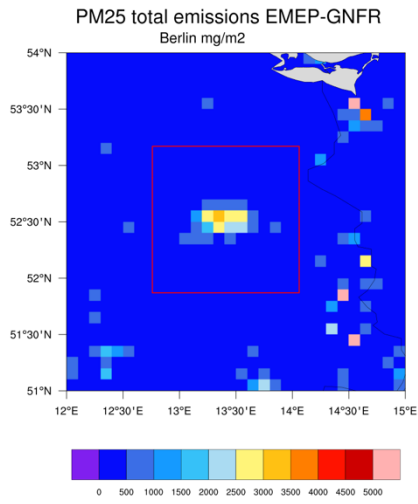

(a)

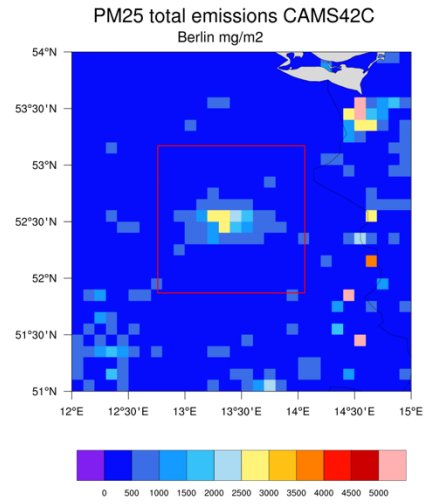

(b)

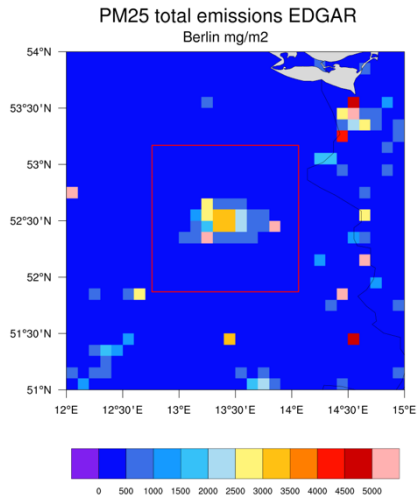

(c)

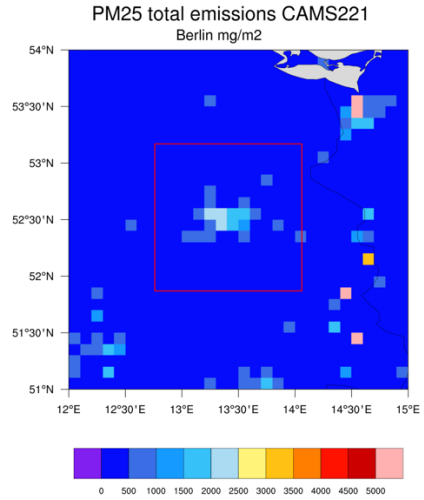

(d)

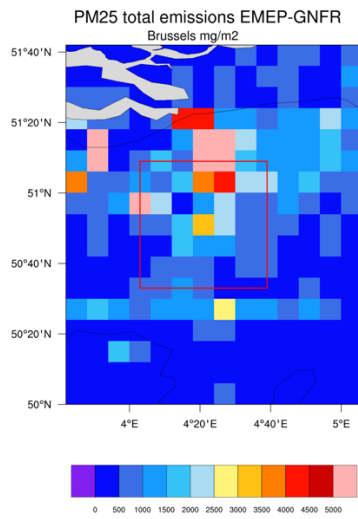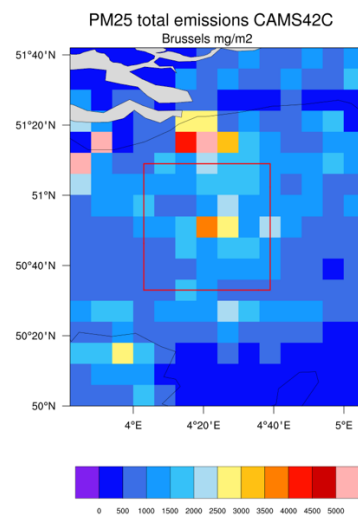

(e)

(f)

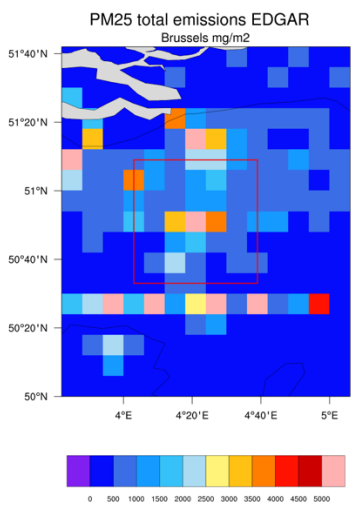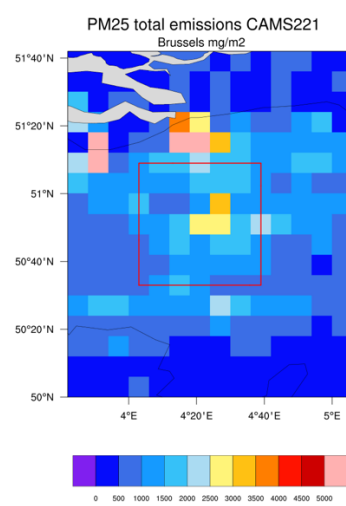

(g)

(h)

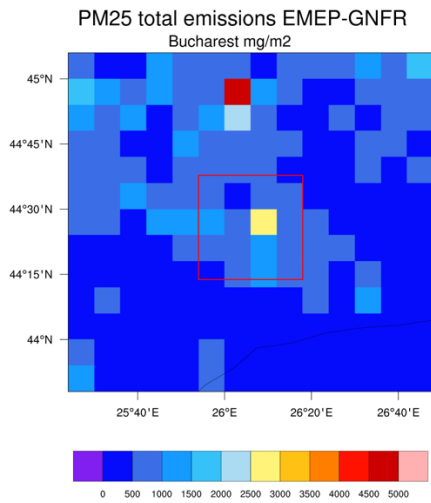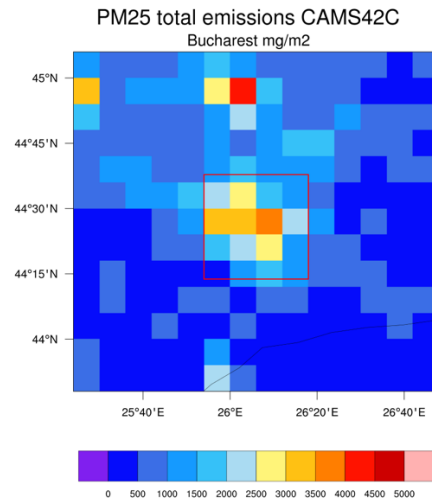

(i)

(j)

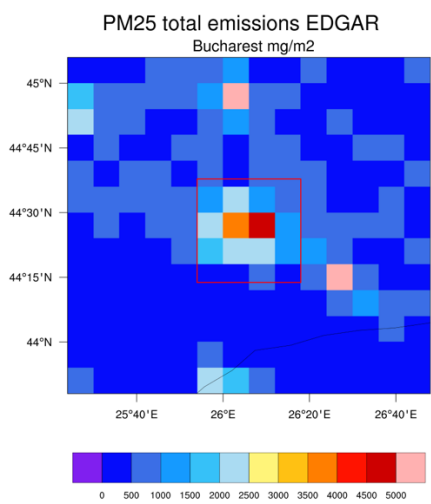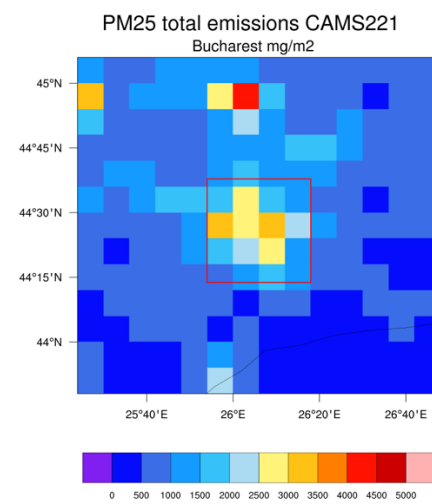

(k)

(l)

PM25 total emissions EMEP-GNFR  
Madrid mg/m2

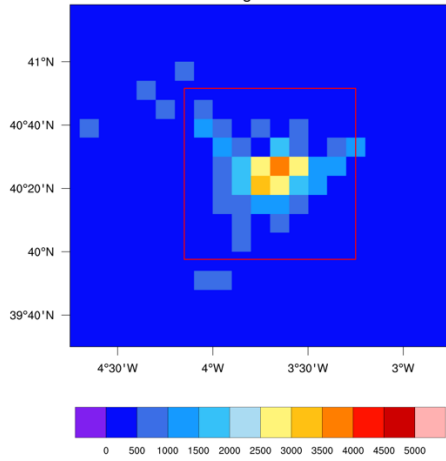

PM25 total emissions CAMS42C  
Madrid mg/m2

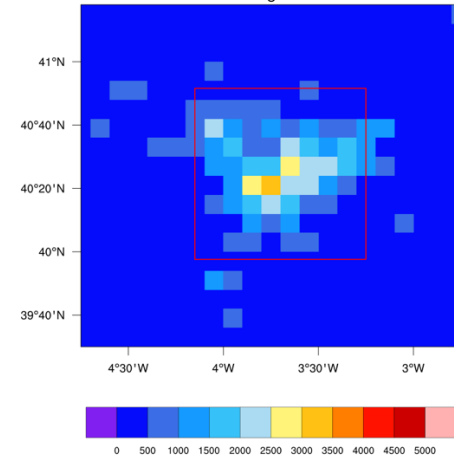

50

(m)

(n)

PM25 total emissions CAMS221  
Madrid mg/m2

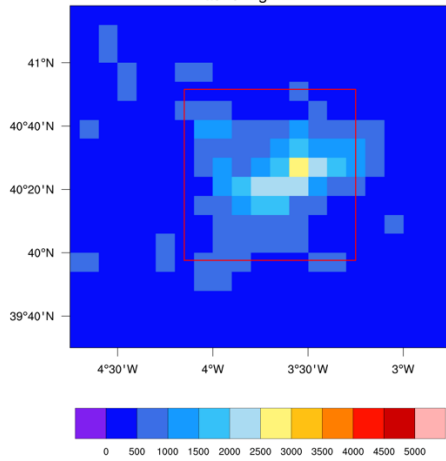

PM25 total emissions EDGAR  
Madrid mg/m2

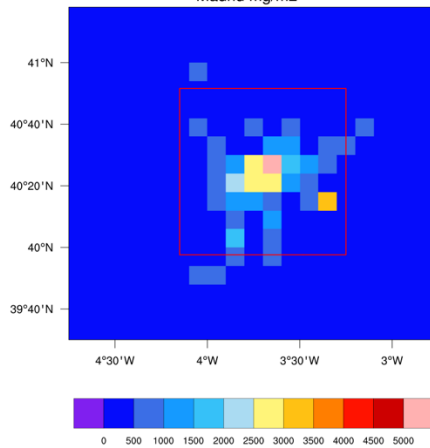

(o)

(p)



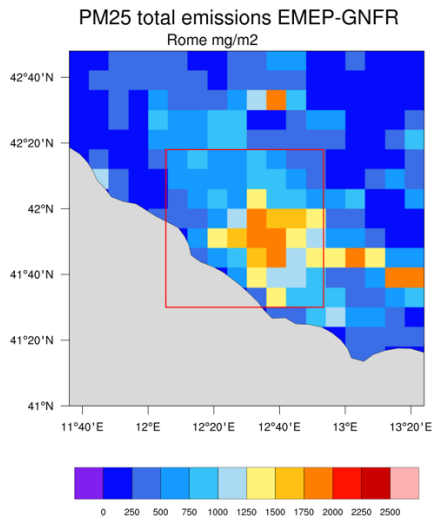

(q)

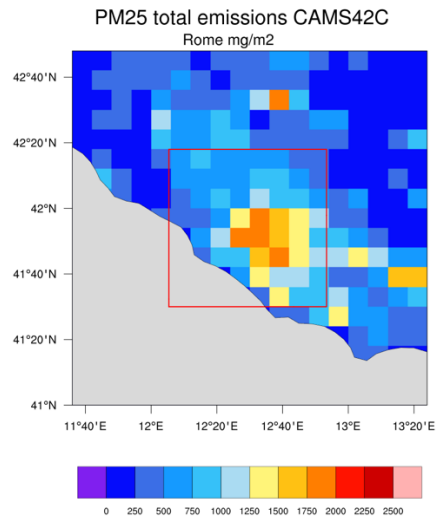

(r)

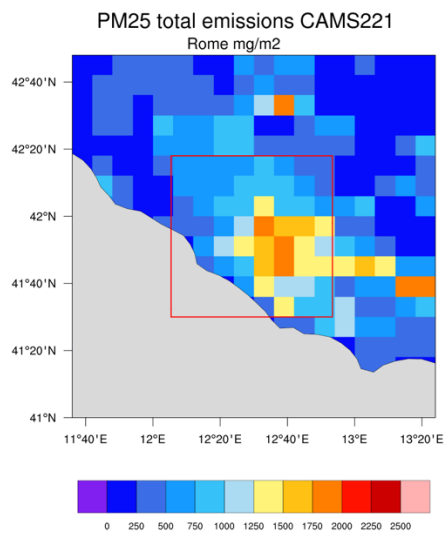

(s)

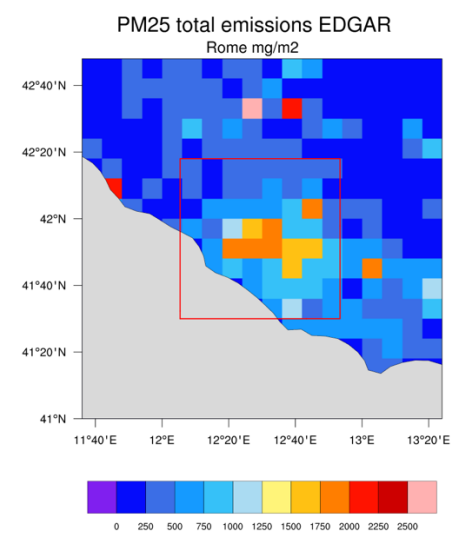

(t)

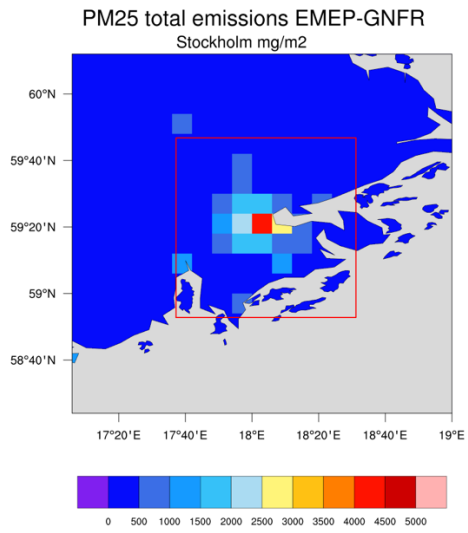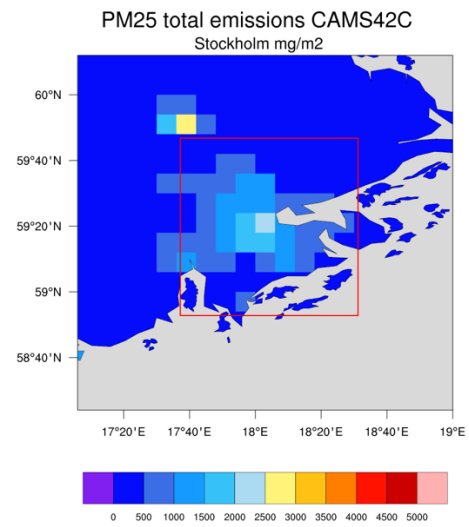

(u)

(v)

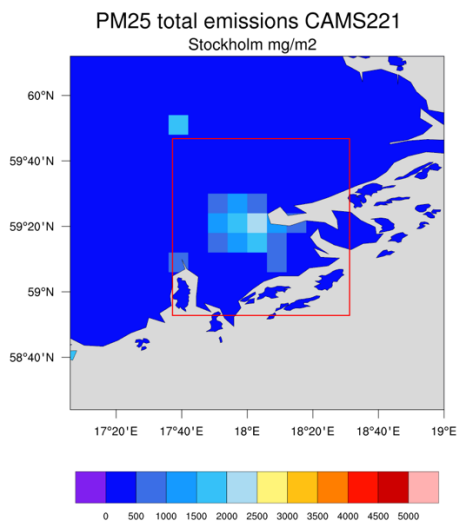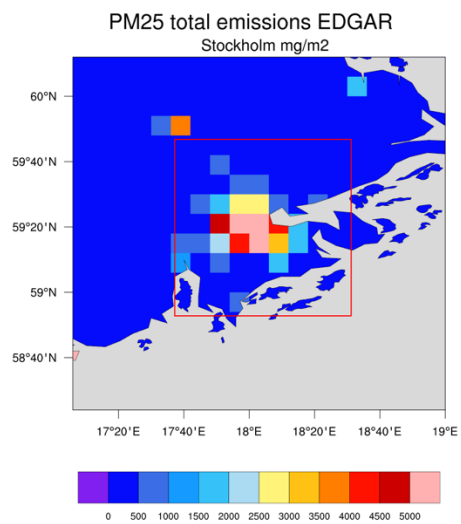

(w)

(x)

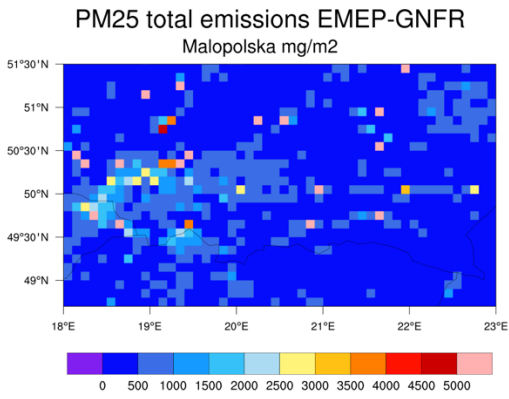

(y)

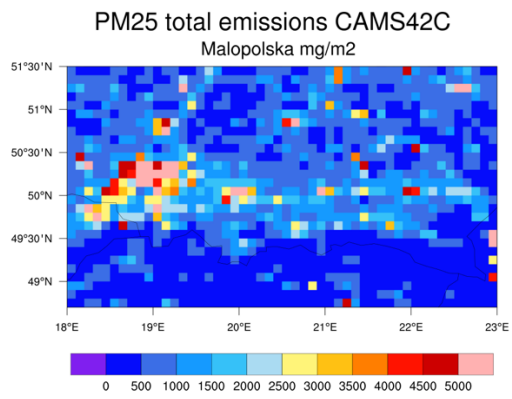

(z)

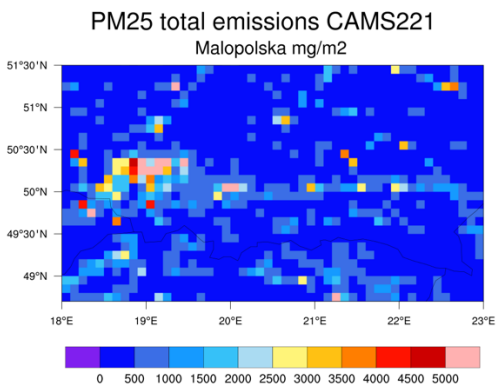

(aa)

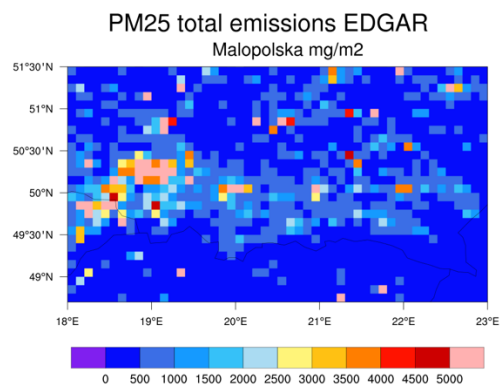

(ab)

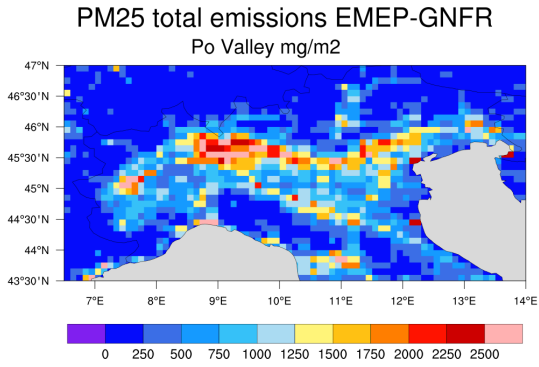

(ac)

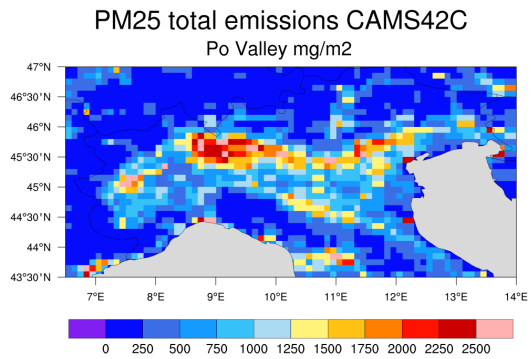

(ad)

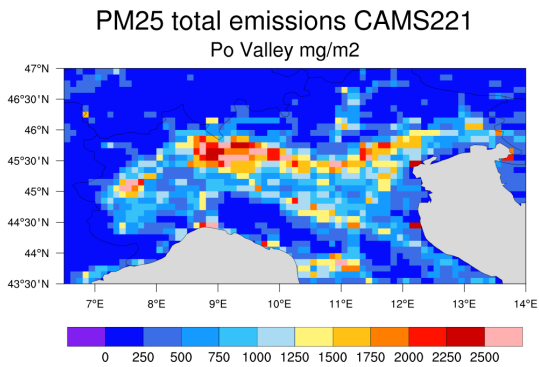

(ae)

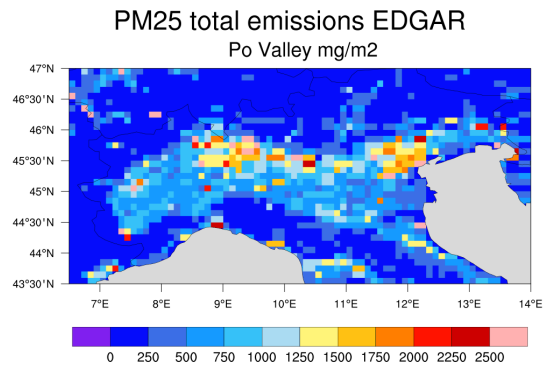

(af)

70

**Figure S1: PM25 geographical distribution (mg/m2/year) for CAMS221, CAMS422C, EDGAR and EMEP-GNFR for Berlin, (a-d) Brussels (e-h), Bucharest (i-l), Madrid (m-p), Rome (q-t), Stockholm (u-x), Malopolska (y-ab) and Po Valley (ac-af). The red rectangle represents the area for which the emissions were reduced, as indicated in Table S1. For the Po Valley and Malopolska the emissions are reduced over the entire domain.**

75

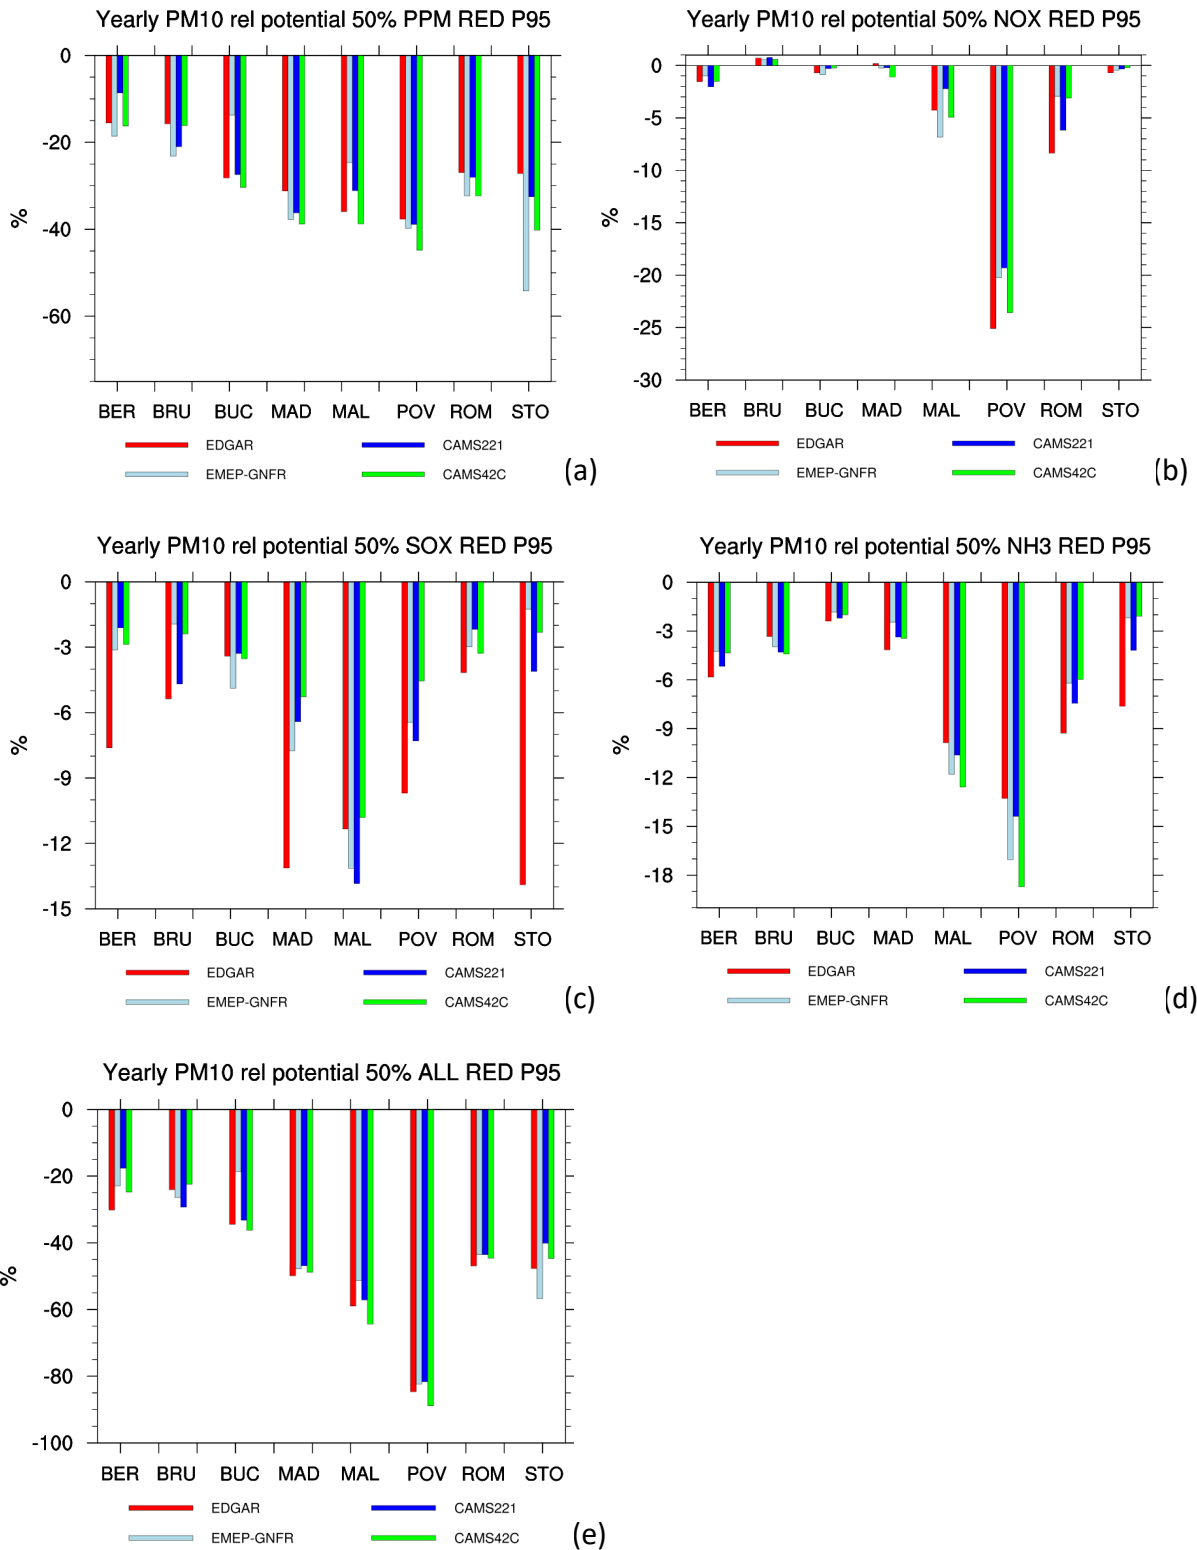

80

85

Figure S2: Yearly average relative potential for 50% reduction of (a) NO<sub>x</sub>, (b) SO<sub>x</sub>, (c) NH<sub>3</sub> and (d) all precursors together (ALL: VOC, SO<sub>x</sub>, NH<sub>3</sub>, PPM) on relative PM<sub>10</sub> concentration change. The values given represent 95 Percentile values (P95), showing the highest 5% values in the domain for the BaseCase. EDGAR (red), EMEP-GNFR (light blue), CAMS221 (blue) and CAMS42C (green), for the eight locations (Berlin, Brussels, Bucharest, Madrid, Malopolska region, Po Valley region, Rome and Stockholm).

90

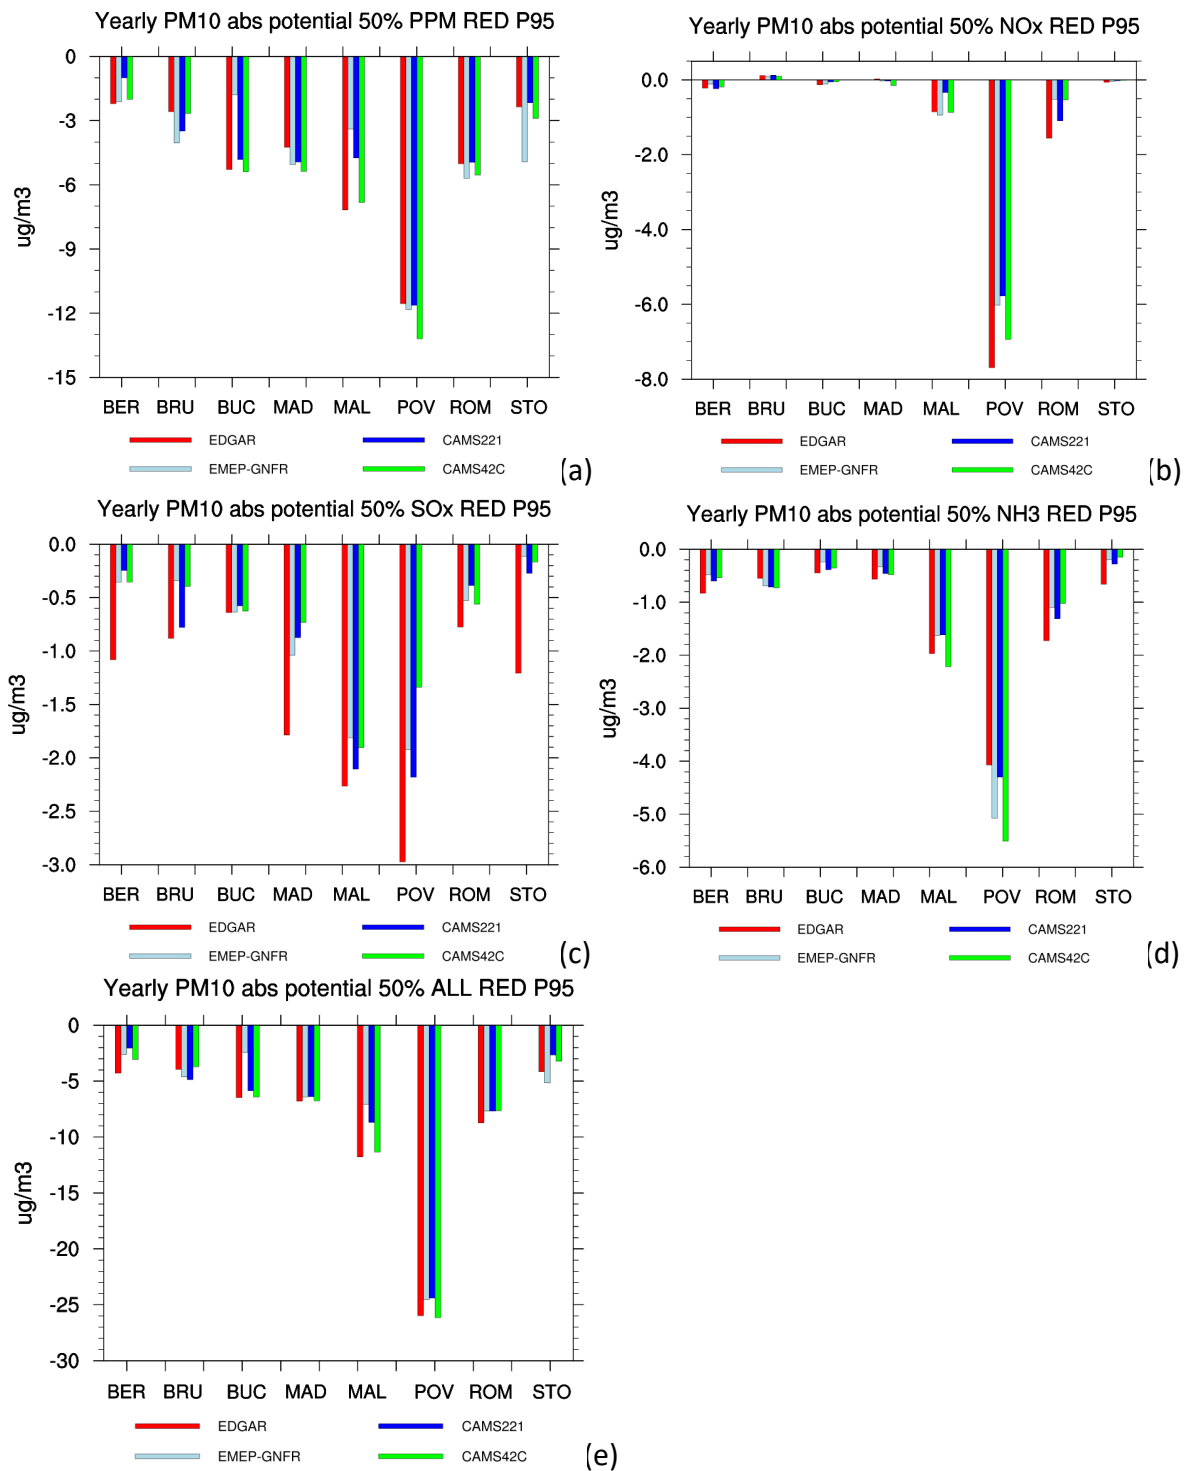

95

Figure S3: Yearly average absolute potential for 50% reduction of (a) NOx, (b) SOx, (c) NH3 and (d) all precursors together (ALL: VOC, SOx, NH3, PPM) on relative PM10 concentration change. The values given represent 95 Percentile values (P95), showing the highest 5% values in the domain for the BaseCase. EDGAR (red), EMEP-GNFR (light blue), CAMS221 (blue) and CAMS42C (green), for the eight locations (Berlin, Brussels, Bucharest, Madrid, Malopolska region, Po Valley region, Rome and Stockholm).

100

When NOx emissions are reduced by 50% (Fig. S2 and S3), we see in general a decrease in calculated PM10 concentrations, but for Brussels we see a slight increase. The reason for this is that over urbanized areas, lower

105 NO<sub>2</sub> concentrations at constant or similar VOC concentrations lead to an increase of ozone (O<sub>3</sub>) values. O<sub>3</sub> is a reactive oxidant in natural and polluted atmosphere and increasing levels of O<sub>3</sub> concentrations lead to an enhancement of the atmospheric oxidizing capacity, which might lead to an increase in the Secondary Organic Aerosol (SOA) formation and Organic Aerosol (OA) components (Thunis et al., 2021a and references therein). It appears that reducing PPM emissions by 50% shows the largest effective measure to reduce PM<sub>10</sub> concentrations when compared to the aerosol precursors.

110

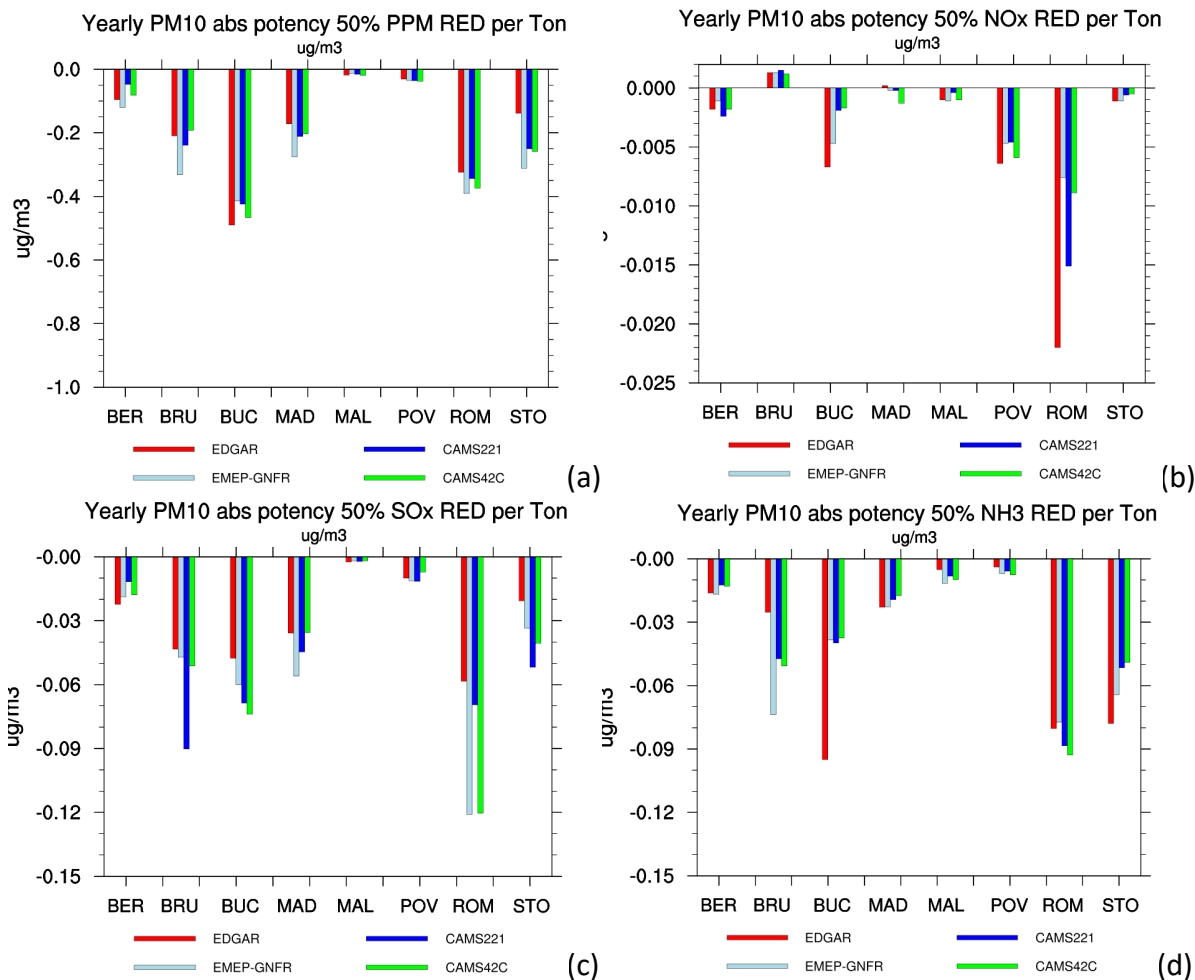

115 **Figure S4: Yearly average absolute potency for 50% reduction of (a) PPM, (b) NO<sub>x</sub>, (c) SO<sub>x</sub>, (d) NH<sub>3</sub> on PM10 concentration change. The values given represent 95 Percentile values, showing the highest 5% values in the domain for the BaseCase. EDGAR (red), EMEP-GNFR (light blue), CAMS221 (blue) and CAMS42C (green), for the eight locations (Berlin [BER], Brussels [BRU], Bucharest [BUC], Madrid [MAD], Malopolska region [MAL], Po Valley region [POV], Rome [ROM] and Stockholm [STO]).**

120

The very low values in the potencies for Malopolska and Po Valley can be explained by the fact that we divide by the emissions that are much larger, because they cover an entire region rather than a city.

We see that the most effective reduction of the secondary aerosol part is obtained by reducing SO<sub>x</sub> emissions, because the potencies for SO<sub>x</sub> are in general higher than for NO<sub>x</sub>.

125



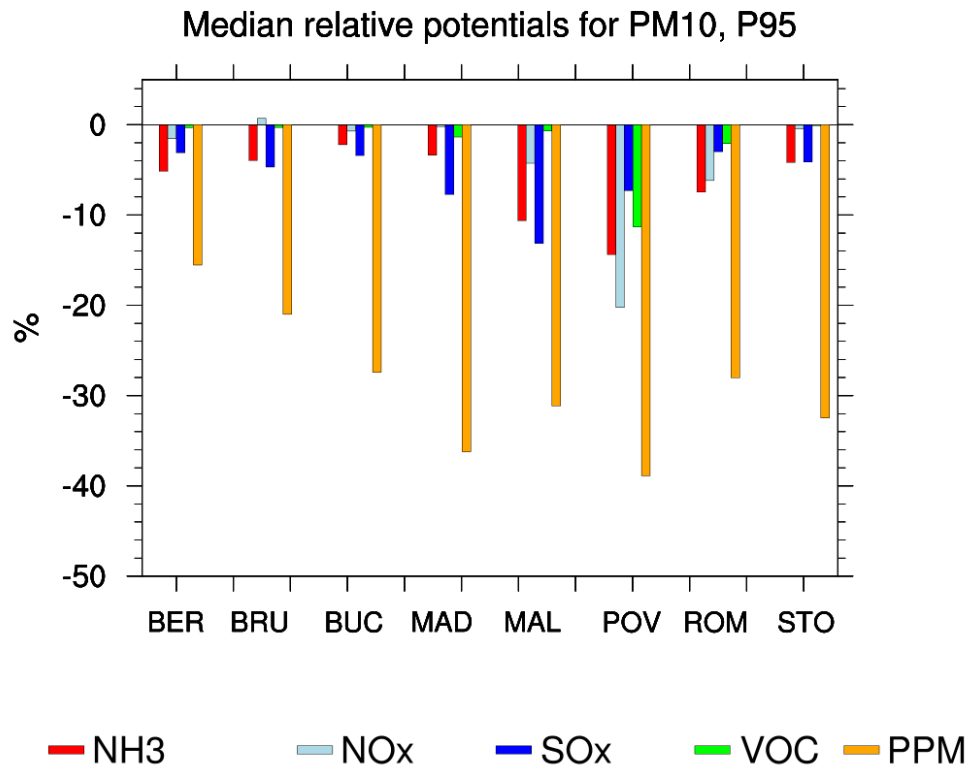

Figure S5: Median relative potential for PM10 for the eight locations, Berlin [BER], Brussels [BRU], Bucharest [BUC], Madrid [MAD], Malopolska region [MAL], Po Valley region [POV], Rome [ROM] and Stockholm [STO]). The median is based on EDGAR, CAMS221 and EMEP-GNFR. The values given represent 95 Percentile values, showing the highest 5% values in the domain for the BaseCase.

130

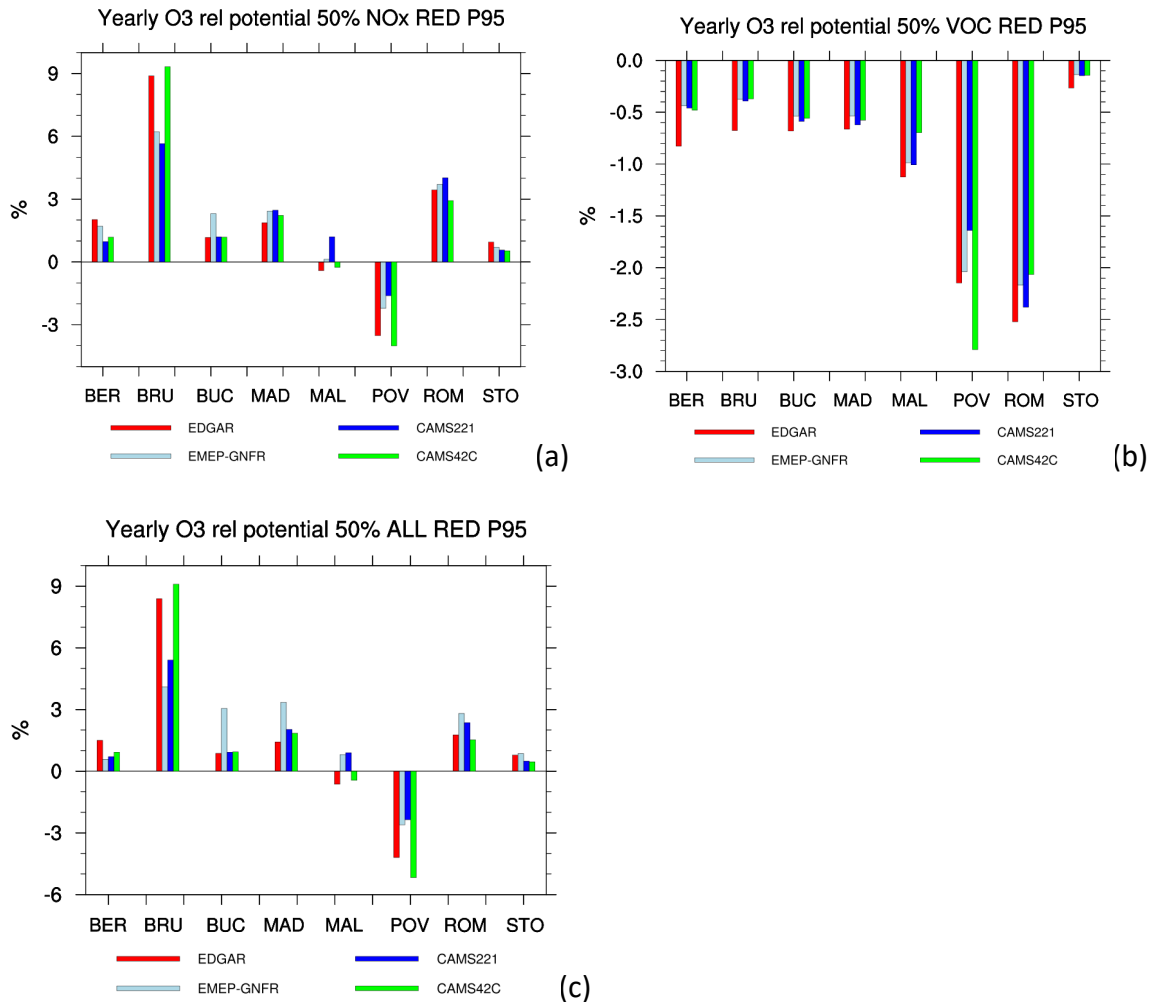

135

140

**Figure S6: Yearly average relative potential for 50% reduction of (a) NO<sub>x</sub>, (b) VOC and (c) ALL (NO<sub>x</sub> + VOC) on relative O<sub>3</sub> concentration change. The values given represent 95 Percentile values (P95), showing the highest 5% values in the domain for the BaseCase. EDGAR (red), EMEP-GNFR (light blue), CAMS221 (blue) and CAMS42C (green), for the eight locations (Berlin [BER], Brussels [BRU], Bucharest [BUC], Madrid [MAD], Malopolska region [MAL], Po Valley region [POV], Rome [ROM] and Stockholm [STO]).**

145

Whether reductions in NO<sub>x</sub> or VOC emissions will lead to lower O<sub>3</sub> concentrations depend on location and on the type of chemical regime, also better known as NO<sub>x</sub> - or VOC-limited regimes. This means that for NO<sub>x</sub> - limited regimes (locations downwind of urban and suburban areas), lowering NO<sub>x</sub> concentrations at constant VOC levels or in combination with lowering VOCs results in lower O<sub>3</sub> peak concentrations. So, decreasing the available NO<sub>x</sub> leads directly to a decrease in ozone. In VOC-limited areas (highly polluted urban areas), where VOCs are kept constant, but NO<sub>x</sub> emissions are reduced, lead to, opposite, higher O<sub>3</sub> concentrations (Fig. S6a).

150

On the other hand, lowering VOCs and keeping NO<sub>x</sub> constant lead to reduced O<sub>3</sub> values (Fig. S6b). When VOCs and NO<sub>x</sub> are decreased proportionately at the same time O<sub>3</sub> increase (Fig. S6c).

155

The underlying reason for the increase when NO<sub>x</sub> emissions are reduced is that less O<sub>3</sub> is removed by NO (NO<sub>x</sub> -titration), therefore augmenting O<sub>3</sub> values in VOC-limited zones, as mentioned earlier. Therefore, we see in general an increase in O<sub>3</sub> values over the urban areas. The side-effect of reducing NO<sub>x</sub> emissions in urban areas

(e.g. via traffic) lead to higher O<sub>3</sub> concentrations and possible exceedances in cities that are currently below the O<sub>3</sub> limit values.

- 160 The negative RP and AP for POV (Fig. S6 and S7) can be explained by the fact that the domain is large when compared to cities (e.g. Brussels, Bucharest, Madrid) and that background concentrations might have an impact on the P95 values. In sub-urban and background areas O<sub>3</sub> decrease when NO<sub>x</sub> emissions are reduced, as mentioned in the main text.
- 165 Fig. S6a shows that for Malopolska, the 50% NO<sub>x</sub> reduction can lead to an increase or decrease on O<sub>3</sub> concentrations depending on the choice of emission inventory.

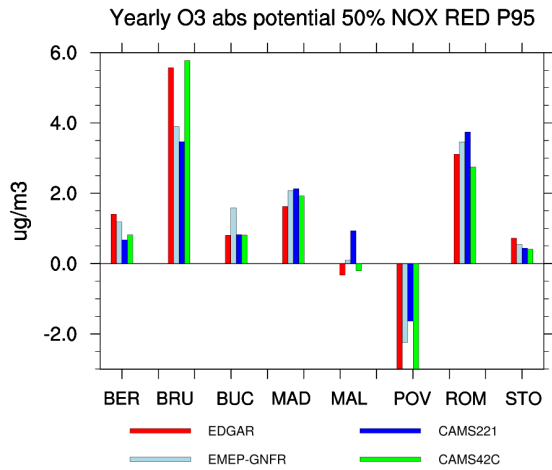

(a)

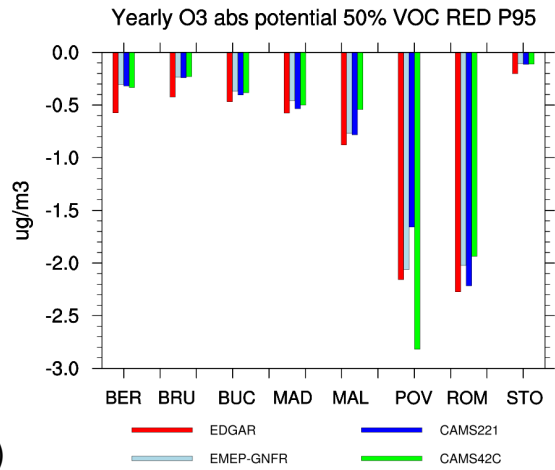

(b)

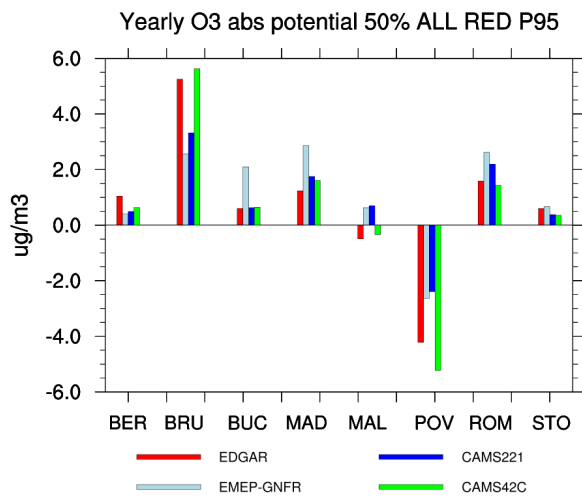

(c)

170

175

Figure S7: Yearly average absolute potential for 50% reduction of (a) NO<sub>x</sub>, (b) VOC and (c) ALL (NO<sub>x</sub> + VOC) on relative O<sub>3</sub> concentration change. The values given represent 95 Percentile values (P95), showing the highest 5% values in the domain for the BaseCase. EDGAR (red), EMEP-GNFR (light blue), CAMS221 (blue) and CAMS42C (green), for the eight locations (Berlin [BER], Brussels [BRU], Bucharest [BUC], Madrid [MAD], Malopolska region [MAL], Po Valley region [POV], Rome [ROM] and Stockholm [STO]).

180

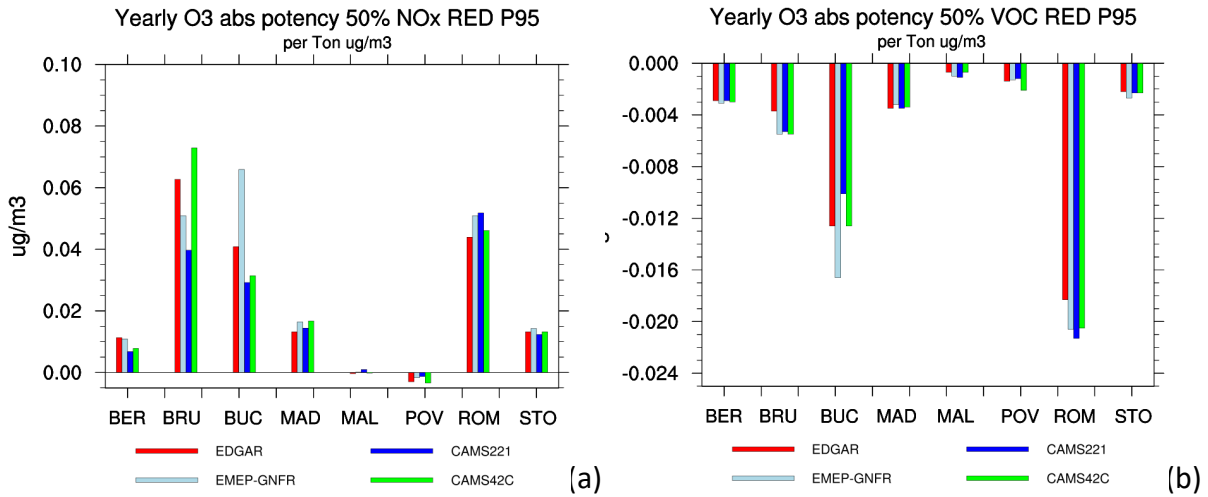

185 **Figure S8: Yearly average potency for (a) 50% NO<sub>x</sub> and (b) 50% VOC reduction on O<sub>3</sub> concentration change (µg/m<sup>3</sup>) per ton emission reduction by EDGAR (red), EMEP-GNFR (light blue), CAMS221 (blue) and CAMS42C (green), for the eight locations (Berlin [BER], Brussels [BRU], Bucharest [BUC], Madrid [MAD], Malopolska region [MAL], Po Valley region [POV], Rome [ROM] and Stockholm [STO]). The values given in (a) and (b) represent 95 Percentile values (P95), showing the highest 5% values in the domain for the BaseCase.**

190

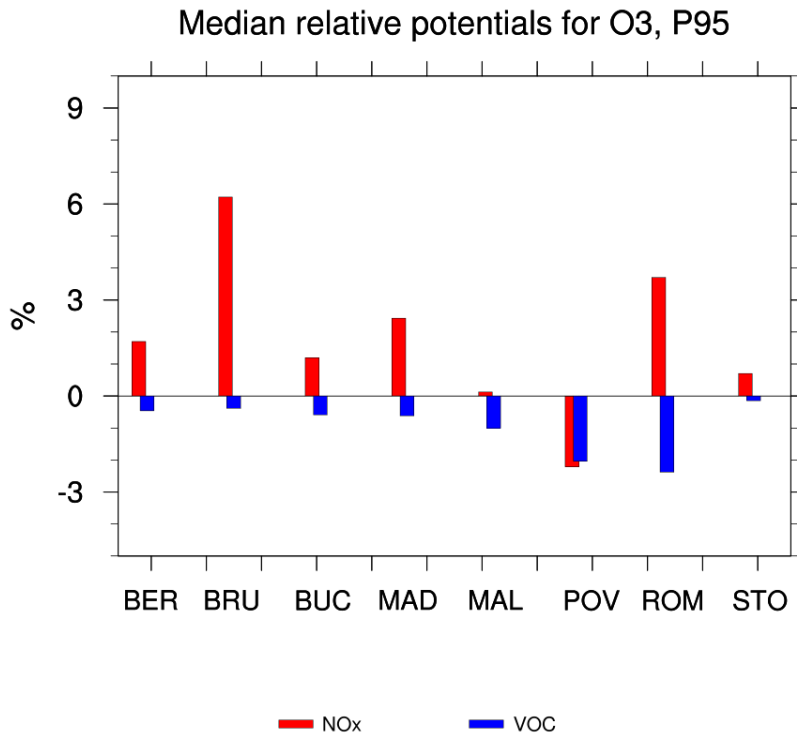

195 **Figure S9: Median relative potential for O<sub>3</sub> for the eight locations, Berlin [BER], Brussels [BRU], Bucharest [BUC], Madrid [MAD], Malopolska region [MAL], Po Valley region [POV], Rome [ROM] and Stockholm [STO]). The median is based on EDGAR, CAMS221 and EMEP-GNFR. The values given represent 95 Percentile values, showing the highest 5% values in the domain for the BaseCase.**
